# Supplementary material
Source: PubMed Central journal article supplement (PMC3838074)
Supplement: JCM.01930-13_zjm999092939so1.pdf [file JCM.01930-13_zjm999092939so1.pdf]

1 Supplementary Information for Turbelidze et al.

2

### 3 **Methods to Sequence and assignment of backbone ORF SNP sets.**

4 Genomic DNA was isolated from the study isolates and indexed fragment libraries were  
5 constructed for sequencing on the Illumina MiSeq platform. Pair-end reads of 150bp were  
6 generated to a depth of ca. 100x sequence coverage and each genome was assembled with  
7 Velvet (v1.1.04-64). All assemblies passed our in-house contamination screen and satisfied the  
8 metrics for a high quality draft sequence defined by the NIH Human Microbiome Project (1).  
9 While variant calling was read-based (below), the evaluation of assemblies provided assurance  
10 that there was no significant contamination or other quality issues in the data.

11 Pair-end MiSeq reads of isolate was mapped to the reference genome Sakai  
12 (gi:15829254, NC002695.1) using BWA (version 0.5.9 (2) and SNPs were detected using  
13 Samtools (version 0.1.12) (3). A minimum read depth of 10 was required for each SNP  
14 detected. Nucmer (an algorithm from MUMmer v3.19) was applied to align the assembled  
15 contigs of each strain to the backbone ORFs of the reference Sakai genome and to generate  
16 primary SNPs calls. Only the SNPs detected by both Samtools and Nucmer and that were in the  
17 backbone ORFS of Sakai were further analyzed. SNPs were also identified for strains 86-24,  
18 87-14, 493-89, TB182A and TW14359 by comparing their backbone ORFs to the backbone  
19 ORFs of Sakai utilizing Nucmer. Further comparison of the SNPs between the strains was  
20 performed in R (4). ANNOVAR was used appropriately to annotate the final SNPs (5).

21 SNPs were validated by orthogonal sequencing using Life Technologies Ion Personal  
22 Genome Machine Sequencer. Life Technologies kits were used for library construction (Ion  
23 Fragment Library Kit, size selected for 390 base pairs +/- 5%), template preparation (Ion  
24 OneTouch 200 Template Kit v2 DL), and sequencing (Ion PGM 300 Sequencing Kit, 640 flows

25 on a 318 chip). Sixteen samples were prepared and sequenced as replicates over two runs.  
26 Library construction methodologies were identical for both runs. Subsequent alignment and  
27 variant calling, and detection of SNPs and insertions and deletions, were performed on an  
28 individual sample basis, in a parallel approach. One path utilized Life Technologies Torrent  
29 Suite (6) software and another, independent, evaluation was performed with the Burrows-  
30 Wheeler Aligner (2, 7) package and SAMtools ([www.samtools.sourceforge.net](http://www.samtools.sourceforge.net)) (3). The Torrent  
31 Suite analysis pipeline, which includes the Torrent Variant Caller, produces a variant report  
32 using settings adjusted to match the error model (i.e., homopolymer errors ) in Ion Torrent data.  
33 In both approaches, all samples were aligned to *E. coli* O157:H7 strain Sakai, complete genome  
34 to call variants.

35 For the purposes of this paper, radial SNPs were sought among each of the 3,442,673  
36 nucleotides in the 3,586 Subgroup C Backbone ORFs (radial SNPs and ORFs defined in Tables  
37 S5 and S7 in reference (8)). Backbone ORF SNP sets were defined as sets of SNPs that are  
38 not present in strain TW14359, (8, 9) but present in one or more study isolates, except the  
39 isolate from case M23. In the first round of sequencing, we used a pilot set of isolates to  
40 determine if isolates from two exposed cases were isogenic and differed from isolates from  
41 cases in Webster County, Missouri, and Washington State. Next, we sequenced additional  
42 isolates, including isolates from cases who reported definite, possible, or no exposure to the  
43 incriminated vehicle or outlet. SNP analysis was performed by authors (H.G. and P.I.T.) who did  
44 not know the epidemiologic history or the origin of the isolates, except for the two Washington  
45 State *E. coli* O157:H7. The code for the isolates and their epidemiologic data was held by a third  
46 author (G.T.), and not broken until after the phylogenetic relationship of the isolates was  
47 constructed by P.I.T. (Figure 1).

48 We characterized SNPs in each of the newly sequenced *E. coli* O157:H7 as belonging to  
49 terminal or proximal backbone ORF SNP sets. Terminal backbone ORF SNP sets are defined

50 as sets of one or more SNPs that by themselves differentiate that group from other groups of  
51 sequenced isolates in the TW14359 lineage. Proximal backbone ORF SNP sets are defined as  
52 sets of one or more SNPs that are shared by isolates that each possess additional and different  
53 terminal backbone ORF SNP sets. One SNP set in this study was a proximal (for one set of  
54 isolates) and a terminal (for three additional isolates) backbone ORF SNP set.

55 All SNPs (except those from the isolate from case M23) that were not present in strain  
56 TW14359 were amplified by PCR for confirmatory (Sanger) sequencing using primers in Table  
57 S1 and published conditions (8).

58

59

60

61

62

63

64

65

66

67

68

69

70

71

72

- 73 1. **Human Microbiome Jumpstart Reference Strains C, Nelson KE, Weinstock GM, Highlander SK,**  
74 **Worley KC, Creasy HH, Wortman JR, Rusch DB, Mitreva M, Sodergren E, Chinwalla AT,**  
75 **Feldgarden M, Gevers D, Haas BJ, Madupu R, Ward DV, Birren BW, Gibbs RA, Methe B,**  
76 **Petrosino JF, Strausberg RL, Sutton GG, White OR, Wilson RK, Durkin S, Giglio MG, Gujja S,**  
77 **Howarth C, Kodira CD, Kyrpides N, Mehta T, Muzny DM, Pearson M, Pepin K, Pati A, Qin X,**  
78 **Yandava C, Zeng Q, Zhang L, Berlin AM, Chen L, Hepburn TA, Johnson J, McCorrison J, Miller J,**  
79 **Minx P, Nusbaum C, Russ C, Sykes SM, Tomlinson CM, Young S, Warren WC, Badger J, Crabtree**  
80 **J, Markowitz VM, Orvis J, Cree A, Ferriera S, Fulton LL, Fulton RS, Gillis M, Hemphill LD, Joshi V,**  
81 **Kovar C, Torralba M, Wetterstrand KA, Abouelleil A, Wollam AM, Buhay CJ, Ding Y, Dugan S,**  
82 **FitzGerald MG, Holder M, Hostetler J, Clifton SW, Allen-Vercoe E, Earl AM, Farmer CN, Liolios**  
83 **K, Surette MG, Xu Q, Pohl C, Wilczek-Boney K, and Zhu D. 2010. A catalog of reference**  
84 **genomes from the human microbiome. Science. 328:994-999.**
- 85 2. **Li H, and Durbin R. 2009. Fast and accurate short read alignment with Burrows-Wheeler**  
86 **transform. Bioinformatics. 25:1754-1760.**
- 87 3. **Li H, Handsaker B, Wysocker A, Fennell T, Ruan J, Homer N, Marth G, Abecasis G, Durbin R, and**  
88 **Genome Project Data Processing S. 2009. The Sequence Alignment/Map format and SAMtools.**  
89 **Bioinformatics. 25:2078-2079.**
- 90 4. **Team DC. 2008. R: A language and environment for statistical computing. R Foundation for**  
91 **Statistical Computing, Vienna, Austria.**
- 92 5. **Wang K, Li M, and Hakonarson H. 2010. ANNOVAR: functional annotation of genetic variants**  
93 **from high-throughput sequencing data. Nucleic Acids Res. 38:e164.**
- 94 6. **Feng P, Lampel KA, Karch H, and Whittam TS. 1998. Genotypic and phenotypic changes in the**  
95 **emergence of Escherichia coli O157:H7. The Journal of infectious diseases. 177:1750-1753.**
- 96 7. **Eppinger M, Daugherty S, Agrawal S, Galens K, Sengamalay N, Sadzewicz L, Tallon L, Cebula**  
97 **TA, Mammel MK, Feng P, Soderlund R, Tarr PI, Debroy C, Dudley EG, Fraser CM, and Ravel J.**  
98 **2013. Whole-Genome Draft Sequences of 26 Enterohemorrhagic Escherichia coli O157:H7**  
99 **Strains. Genome Announc. 1:e0013412.**
- 100 8. **Leopold SR, Magrini V, Holt NJ, Shaikh N, Mardis ER, Cagno J, Ogura Y, Iguchi A, Hayashi T,**  
101 **Mellmann A, Karch H, Besser TE, Sawyer SA, Whittam TS, and Tarr PI. 2009. A precise**  
102 **reconstruction of the emergence and constrained radiations of Escherichia coli O157 portrayed**  
103 **by backbone concatenomic analysis. Proc. Natl. Acad. Sci. U. S. A. 106:8713-8718.**
- 104 9. **Wendel AM, Johnson DH, Sharapov U, Grant J, Archer JR, Monson T, Koschmann C, and Davis**  
105 **JP. 2009. Multistate outbreak of Escherichia coli O157:H7 infection associated with consumption**  
106 **of packaged spinach, August-September 2006: the Wisconsin investigation. Clinical infectious**  
107 **diseases : an official publication of the Infectious Diseases Society of America. 48:1079-1086.**

108

109

**Table S1. SNP Details.**

**Section A.** SNPs previously identified in strain TW14359 in Leopold, et al, Proc Natl Acad Sci U S A. 2009;106:8713-8, and deposited in GenBank under accession number GENBANK: EU892409.1.

| Backbone ORF SNP set number | Locus     | Amino Acid change, if not synonymous | Study strains in which SNP found  | start and stop coordinates (based on <i>E.coli</i> O157 Sakai) | ORF     | Full name of ORF and comments                                           |
|-----------------------------|-----------|--------------------------------------|-----------------------------------|----------------------------------------------------------------|---------|-------------------------------------------------------------------------|
| 1                           | 6674GA    | H/Y                                  | WC1, WC2, Wa1, Wa2, M1-22, K1, K2 | 6546/7976                                                      | ECs7    | putative inner membrane transport protein                               |
| 1                           | 14317GA   | A/T                                  | WC1, WC2, Wa1, Wa2, M1-22, K1, K2 | 14185/15315                                                    | ECs15   | DnaJ protein                                                            |
| 1                           | 430790CT  |                                      | WC1, WC2, Wa1, Wa2, M1-22, K1, K2 | 430715/431524                                                  | ECs405  | 2-keto-4-pentenoate hydratase                                           |
| 1                           | 479657CT  |                                      | WC1, WC2, Wa1, Wa2, M1-22, K1, K2 | 479123/479812                                                  | ECs449  | Positive response regulator for pho regulon PhoB                        |
| 1                           | 556909CT  | R/C                                  | WC1, WC2, Wa1, Wa2, M1-22, K1, K2 | 556777/557154                                                  | ECs521  | putative gene 58                                                        |
| 1                           | 656910AG  |                                      | WC1, WC2, Wa1, Wa2, M1-22, K1, K2 | 656307/656939                                                  | ECs597  | fimbrial Z protein                                                      |
| 1                           | 661692CT  |                                      | WC1, WC2, Wa1, Wa2, M1-22, K1, K2 | 659139/662111                                                  | ECs600  | bacteriophage N4 adsorption protein NfrA                                |
| 1                           | 723747CT  |                                      | WC1, WC2, Wa1, Wa2, M1-22, K1, K2 | 723442/724680                                                  | ECs647  | putative oxidoreductase                                                 |
| 1                           | 787375AT  |                                      | WC1, WC2, Wa1, Wa2, M1-22, K1, K2 | 786116/787780                                                  | ECs710  | glutamine tRNA synthetase                                               |
| 1                           | 866365CT  |                                      | WC1, WC2, Wa1, Wa2, M1-22, K1, K2 | 865949/866992                                                  | ECs778  | quinolinate synthetase A protein                                        |
| 1                           | 941648CG  | T/S                                  | WC1, WC2, Wa1, Wa2, M1-22, K1, K2 | 941413/941658                                                  | ECs862  | molybdopterin biosynthesis protein D chain                              |
| 1                           | 946192CT  | A/T                                  | WC1, WC2, Wa1, Wa2, M1-22, K1, K2 | 946103/946864                                                  | ECs868  | hypothetical protein                                                    |
| 1                           | 988913GA  | A/V                                  | WC1, WC2, Wa1, Wa2, M1-22, K1, K2 | 988714/989463                                                  | ECs904  | molybdopterin biosynthesis MoeB protein                                 |
| 1                           | 1049196GA | R/H                                  | WC1, WC2, Wa1, Wa2, M1-22, K1, K2 | 1047548/1049206                                                | ECs962  | hypothetical protein                                                    |
| 1                           | 1151284AG |                                      | WC1, WC2, Wa1, Wa2, M1-22, K1, K2 | 1151201/1153363                                                | ECs1044 | hypothetical protein                                                    |
| 1                           | 1226849GA |                                      | WC1, WC2, Wa1, Wa2, M1-22, K1, K2 | 1224980/1227076                                                | ECs1140 | hypothetical protein                                                    |
| 1                           | 1725872CT |                                      | WC1, WC2, Wa1, Wa2, M1-22, K1, K2 | 1725087/1728830                                                | ECs1729 | nitrate reductase 1 alpha subunit                                       |
| 1                           | 1837132GT | G/C                                  | WC1, WC2, Wa1, Wa2, M1-22, K1, K2 | 1836538/1839213                                                | ECs1849 | aconitate hydratase 1                                                   |
| 1                           | 1902934AG | Y/C                                  | WC1, WC2, Wa1, Wa2, M1-22, K1, K2 | 1902564/1904198                                                | ECs1911 | putative transport periplasmic protein                                  |
| 1                           | 2002772GA |                                      | WC1, WC2, Wa1, Wa2, M1-22, K1, K2 | 1998948/2002793                                                | ECs2015 | ATP-dependent helicase HrpA                                             |
| 1                           | 2055091TC | K/E                                  | WC1, WC2, Wa1, Wa2, M1-22, K1, K2 | 2054201/2055094                                                | ECs2067 | hypothetical protein                                                    |
| 1                           | 2118004GA |                                      | WC1, WC2, Wa1, Wa2, M1-22, K1, K2 | 2117977/2122008                                                | ECs2117 | hypothetical protein                                                    |
| 1                           | 2346918CT | P/L                                  | WC1, WC2, Wa1, Wa2, M1-22, K1, K2 | 2346842/2348446                                                | ECs2375 | hypothetical protein                                                    |
| 1                           | 2410770GA |                                      | WC1, WC2, Wa1, Wa2, M1-22, K1, K2 | 2410648/2412039                                                | ECs2435 | part of a kinase                                                        |
| 1                           | 2416801TC | D/G                                  | WC1, WC2, Wa1, Wa2, M1-22, K1, K2 | 2416659/2418011                                                | ECs2440 | phospho-beta-glucosidase                                                |
| 1                           | 2423779TA | L/Q                                  | WC1, WC2, Wa1, Wa2, M1-22, K1, K2 | 2423028/2423915                                                | ECs2447 | putative excinuclease subunit                                           |
| 1                           | 2452510GT |                                      | WC1, WC2, Wa1, Wa2, M1-22, K1, K2 | 2452172/2452831                                                | ECs2475 | hypothetical protein                                                    |
| 1                           | 2452556TC | F/L                                  | WC1, WC2, Wa1, Wa2, M1-22, K1, K2 | 2452172/2452831                                                | ECs2475 | hypothetical protein                                                    |
| 1                           | 2473176GA | R/H                                  | WC1, WC2, Wa1, Wa2, M1-22, K1, K2 | 2472122/2473465                                                | ECs2494 | hypothetical protein                                                    |
| 1                           | 2508129GT | F/L                                  | WC1, WC2, Wa1, Wa2, M1-22, K1, K2 | 2508081/2508890                                                | ECs2532 | putative enzyme                                                         |
| 1                           | 2512684CT |                                      | WC1, WC2, Wa1, Wa2, M1-22, K1, K2 | 2511995/2513479                                                | ECs2538 | putative transport protein                                              |
| 1                           | 2544711GA |                                      | WC1, WC2, Wa1, Wa2, M1-22, K1, K2 | 2544493/2545248                                                | ECs2568 | putative ATP-binding component of a transport system                    |
| 1                           | 2769998GA | P/S                                  | WC1, WC2, Wa1, Wa2, M1-22, K1, K2 | 2769387/2770400                                                | ECs2828 | regulator of length of O-antigen component of lipopolysaccharide chains |

|   |           |     |                                   |                 |         |                                                                     |
|---|-----------|-----|-----------------------------------|-----------------|---------|---------------------------------------------------------------------|
| 1 | 2792291GT | R/S | WC1, WC2, Wa1, Wa2, M1-22, K1, K2 | 2791287/2792507 | ECs2849 | putative colanic acid biosynthesis glycosyl transferase             |
| 1 | 2799943GA |     | WC1, WC2, Wa1, Wa2, M1-22, K1, K2 | 2799895/2801118 | ECs2855 | putative colanic biosynthesis glycosyl transferase                  |
| 1 | 2804346GA | A/V | WC1, WC2, Wa1, Wa2, M1-22, K1, K2 | 2804279/2805025 | ECs2860 | putative colanic acid biosynthesis glycosyl transferase             |
| 1 | 2807112TC | S/G | WC1, WC2, Wa1, Wa2, M1-22, K1, K2 | 2806228/2807445 | ECs2862 | putative glycosyl transferase                                       |
| 1 | 2887014CT | A/V | WC1, WC2, Wa1, Wa2, M1-22, K1, K2 | 2886917/2887648 | ECs2929 | hypothetical protein                                                |
| 1 | 2887845AC | T/P | WC1, WC2, Wa1, Wa2, M1-22, K1, K2 | 2887641/2888777 | ECs2930 | hypothetical protein                                                |
| 1 | 2973134TG | S/R | WC1, WC2, Wa1, Wa2, M1-22, K1, K2 | 2972763/2974283 | ECs3041 | ATP-binding component of methyl-galactoside transport system        |
| 1 | 3053617CT | G/S | WC1, WC2, Wa1, Wa2, M1-22, K1, K2 | 3053138/3053914 | ECs3108 | hypothetical protein                                                |
| 1 | 3069642GA | T/I | WC1, WC2, Wa1, Wa2, M1-22, K1, K2 | 3066200/3069952 | ECs3116 | putative ATP-binding component of a transport system                |
| 1 | 3069841CT | D/N | WC1, WC2, Wa1, Wa2, M1-22, K1, K2 | 3066200/3069952 | ECs3116 | putative ATP-binding component of a transport system                |
| 1 | 3095943CT | R/H | WC1, WC2, Wa1, Wa2, M1-22, K1, K2 | 3095531/3096133 | ECs3140 | aluminum-inducible protein                                          |
| 1 | 3098294TC |     | WC1, WC2, Wa1, Wa2, M1-22, K1, K2 | 3097584/3098552 | ECs3142 | putative sugar transferase                                          |
| 1 | 3164771CA | R/S | WC1, WC2, Wa1, Wa2, M1-22, K1, K2 | 3164303/3165298 | ECs3205 | cell division protein                                               |
| 1 | 3165502GA |     | WC1, WC2, Wa1, Wa2, M1-22, K1, K2 | 3165295/3166473 | ECs3206 | putative transport protein                                          |
| 1 | 3222307CT | E/K | WC1, WC2, Wa1, Wa2, M1-22, K1, K2 | 3221900/3222535 | ECs3255 | hypothetical protein                                                |
| 1 | 3281701GA | R/C | WC1, WC2, Wa1, Wa2, M1-22, K1, K2 | 3280421/3281782 | ECs3312 | ethanolamine ammonia-lyase heavy chain                              |
| 1 | 3286717TC | I/V | WC1, WC2, Wa1, Wa2, M1-22, K1, K2 | 3286544/3287947 | ECs3317 | ethanolamine utilization protein EutE                               |
| 1 | 3293290GA |     | WC1, WC2, Wa1, Wa2, M1-22, K1, K2 | 3292222/3294501 | ECs3325 | putative multimodular enzyme                                        |
| 1 | 3296574CT | A/V | WC1, WC2, Wa1, Wa2, M1-22, K1, K2 | 3295760/3297763 | ECs3327 | transketolase 2 isozyme                                             |
| 1 | 3322711CT | P/S | WC1, WC2, Wa1, Wa2, M1-22, K1, K2 | 3322357/3323007 | ECs3347 | hydrogenase 4 membrane subunit                                      |
| 1 | 3323566GA |     | WC1, WC2, Wa1, Wa2, M1-22, K1, K2 | 3323012/3324592 | ECs3348 | hydrogenase 4 membrane subunit                                      |
| 1 | 3384416GC |     | WC1, WC2, Wa1, Wa2, M1-22, K1, K2 | 3383943/3384746 | ECs3399 | extragenic suppressor protein SuhB                                  |
| 1 | 3439915GA |     | WC1, WC2, Wa1, Wa2, M1-22, K1, K2 | 3439397/3440119 | ECs3449 | hypothetical protein                                                |
| 1 | 3443184GC | V/L | WC1, WC2, Wa1, Wa2, M1-22, K1, K2 | 3442923/3444281 | ECs3452 | phosphatidylserine synthase                                         |
| 1 | 3529080TC |     | WC1, WC2, Wa1, Wa2, M1-22, K1, K2 | 3528967/3530169 | ECs3540 | ATP-binding component of glycine betaine / proline transport system |
| 1 | 3535377GT | Q/H | WC1, WC2, Wa1, Wa2, M1-22, K1, K2 | 3534928/3535458 | ECs3546 | regulator of plasmid mcrB operon                                    |
| 1 | 3656053GT | D/E | WC1, WC2, Wa1, Wa2, M1-22, K1, K2 | 3655441/3656088 | ECs3660 | L-fucose-1-phosphate aldolase                                       |
| 1 | 3672410GT | A/S | WC1, WC2, Wa1, Wa2, M1-22, K1, K2 | 3671642/3672973 | ECs3675 | N-acetylglutamate synthase                                          |
| 1 | 3697431CT |     | WC1, WC2, Wa1, Wa2, M1-22, K1, K2 | 3696255/3698414 | ECs3693 | 2-acyl-glycerophospho-ethanolamine acyltransferase                  |
| 1 | 3763970AG | T/A | WC1, WC2, Wa1, Wa2, M1-22, K1, K2 | 3763916/3765235 | ECs3756 | hypothetical protein                                                |
| 1 | 3838445CT | R/C | WC1, WC2, Wa1, Wa2, M1-22, K1, K2 | 3838187/3838780 | ECs3830 | putative ribosomal protein                                          |
| 1 | 3947080CT |     | WC1, WC2, Wa1, Wa2, M1-22, K1, K2 | 3946901/3947506 | ECs3945 | L-tartrate dehydratase subunit B                                    |
| 1 | 4007053GA |     | WC1, WC2, Wa1, Wa2, M1-22, K1, K2 | 4006883/4007227 | ECs3999 | threonine dehydratase operon activator protein                      |
| 1 | 4055003GA | A/V | WC1, WC2, Wa1, Wa2, M1-22, K1, K2 | 4054330/4055274 | ECs4047 | tRNA pseudouridine 5S synthase                                      |
| 1 | 4058766GA | A/V | WC1, WC2, Wa1, Wa2, M1-22, K1, K2 | 4058537/4060024 | ECs4050 | transcription termination-antitermination factor NusA               |
| 1 | 4062632GA | P/S | WC1, WC2, Wa1, Wa2, M1-22, K1, K2 | 4062486/4064129 | ECs4053 | putative alkaline phosphatase I                                     |
| 1 | 4151813GA | V/I | WC1, WC2, Wa1, Wa2, M1-22, K1, K2 | 4149992/4151878 | ECs4138 | putative integral transmembrane protein                             |
| 1 | 4198837GA |     | WC1, WC2, Wa1, Wa2, M1-22, K1, K2 | 4198735/4200513 | ECs4201 | NEM-activable K <sup>+</sup> /H <sup>+</sup> antiporter             |
| 1 | 4223005GC |     | WC1, WC2, Wa1, Wa2, M1-22, K1, K2 | 4222256/4223083 | ECs4223 | hypothetical protein                                                |
| 1 | 4253565GA |     | WC1, WC2, Wa1, Wa2, M1-22, K1, K2 | 4252582/4254903 | ECs4251 | ferrous iron transport protein B                                    |
| 1 | 4273017GA |     | WC1, WC2, Wa1, Wa2, M1-22, K1, K2 | 4272795/4273553 | ECs4266 | repressor of the glp operon                                         |

|   |           |     |                                   |                 |         |                                                           |
|---|-----------|-----|-----------------------------------|-----------------|---------|-----------------------------------------------------------|
| 1 | 4305379CA | A/S | WC1, WC2, Wa1, Wa2, M1-22, K1, K2 | 4305029/4305772 | ECs4295 | glycerophosphodiester phosphodiesterase                   |
| 1 | 4362446GA | P/S | WC1, WC2, Wa1, Wa2, M1-22, K1, K2 | 4361280/4363964 | ECs4359 | putative ATP-binding component of a transport system      |
| 1 | 4367684GA | P/L | WC1, WC2, Wa1, Wa2, M1-22, K1, K2 | 4367329/4368939 | ECs4362 | hypothetical protein                                      |
| 1 | 4413603GA |     | WC1, WC2, Wa1, Wa2, M1-22, K1, K2 | 4413429/4414031 | ECs4400 | putative regulator                                        |
| 1 | 4487234GT |     | WC1, WC2, Wa1, Wa2, M1-22, K1, K2 | 4487192/4487665 | ECs4456 | hypothetical protein                                      |
| 1 | 4705476GA |     | WC1, WC2, Wa1, Wa2, M1-22, K1, K2 | 4705284/4707113 | ECs4671 | N-acetyl glucosamine-1-phosphate uridyltransferase        |
| 1 | 4773029GA |     | WC1, WC2, Wa1, Wa2, M1-22, K1, K2 | 4772007/4773359 | ECs4727 | probable UDP-N-acetyl-D-mannosaminuronic acid transferase |
| 1 | 4778904GA |     | WC1, WC2, Wa1, Wa2, M1-22, K1, K2 | 4777992/4779647 | ECs4731 | HemY protein                                              |
| 1 | 4786550CT |     | WC1, WC2, Wa1, Wa2, M1-22, K1, K2 | 4784811/4787357 | ECs4736 | hypothetical protein                                      |
| 1 | 4971458CT | G/S | WC1, WC2, Wa1, Wa2, M1-22, K1, K2 | 4971435/4972535 | ECs4896 | outer membrane vitamin B12 receptor protein BtuB          |
| 1 | 4988108TG |     | WC1, WC2, Wa1, Wa2, M1-22, K1, K2 | 4987896/4988600 | ECs4907 | 50S ribosomal subunit protein L10                         |
| 1 | 4992513CT |     | WC1, WC2, Wa1, Wa2, M1-22, K1, K2 | 4990141/4994169 | ECs4910 | RNA polymerase beta prime subunit                         |
| 1 | 5137547AC |     | WC1, WC2, Wa1, Wa2, M1-22, K1, K2 | 5136401/5138050 | ECs5049 | putative transport protein                                |
| 1 | 5141169GA | R/H | WC1, WC2, Wa1, Wa2, M1-22, K1, K2 | 5140913/5142349 | ECs5052 | periplasmic cytochrome c(552)                             |
| 1 | 5259986GT | R/L | WC1, WC2, Wa1, Wa2, M1-22, K1, K2 | 5259916/5260341 | ECs5154 | hypothetical protein                                      |
| 1 | 5270403GA | P/L | WC1, WC2, Wa1, Wa2, M1-22, K1, K2 | 5270168/5270596 | ECs5165 | hypothetical protein                                      |
| 1 | 5337294GA |     | WC1, WC2, Wa1, Wa2, M1-22, K1, K2 | 5336379/5339234 | ECs5235 | valine tRNA synthetase                                    |
| 1 | 5343889CT |     | WC1, WC2, Wa1, Wa2, M1-22, K1, K2 | 5342906/5343991 | ECs5239 | hypothetical protein                                      |
| 1 | 5460247AC | V/G | WC1, WC2, Wa1, Wa2, M1-22, K1, K2 | 5459982/5460308 | ECs5323 | hypothetical protein                                      |
| 5 | 343210GA  | H/Y | WA1, WA2, M1-22, K1, K2           | 343154/343744   | ECs324  | putative regulator                                        |
| 5 | 1226896GA | R/W | WA1, WA2, M1-22, K1, K2           | 1224980/1227076 | ECs1140 | hypothetical protein                                      |
| 5 | 3285750GA |     | WA1, WA2, M1-22, K1, K2           | 3285697/3286533 | ECs3316 | ethanolamine utilization protein EutJ                     |
| 5 | 3319230GA | G/S | WA1, WA2, M1-22, K1, K2           | 3317913/3319931 | ECs3344 | hydrogenase 4 membrane subunit                            |
| 5 | 4352057GA |     | WA1, WA2, M1-22, K1, K2           | 4351620/4352384 | ECs4346 | ATP-binding protein of nickel transport system            |
| 5 | 5396102CT | P/S | WA1, WA2, M1-22, K1, K2           | 5395865/5396467 | ECs5271 | type 1 fimbriae regulatory recombinase protein FimB       |

**Section B.** Details regarding SNPs identified in this study.

| Backbone ORF SNP set number | Locus     | Amino Acid change, if not synonymous | Study strains in which SNP found | Forward / Reverse Primer (5'-3') used for confirmation of SNP by Sanger sequencing | start and stop coordinates (based on E.coli O157 Sakai) |         | Full name of ORF and comments                       |
|-----------------------------|-----------|--------------------------------------|----------------------------------|------------------------------------------------------------------------------------|---------------------------------------------------------|---------|-----------------------------------------------------|
|                             |           |                                      |                                  |                                                                                    | ORF                                                     | ORF     |                                                     |
| 2                           | 801508CT  | R/H                                  | WC1, WC2                         | AGT AAG GTT CCC GAT CAC CAG/<br>TAC AGA TTC AGG GAT GCG TGG                        | 800157/<br>802841                                       | ECs0723 | sensor for high-affinity potassium transport system |
| 2                           | 1245136CT | P/L                                  | WC1, WC2                         | AAC CGT ATC AGT TGC ATG ACC/<br>AGG TAG CGA TGA AGT GTT AGT C                      | 1243938/<br>1245179                                     | ECs1158 | periplasmic glucose-1-phosphatase                   |
| 2                           | 1908590GT | S/Y                                  | WC1, WC2                         | AAT TGC TCA TCG CAA ATC ACC/<br>TGA CCG ATA TCC TGG AAA GTT C                      | 1908406/<br>1909098                                     | ECs1917 | hypothetical protein                                |
| 2                           | 2140505GT | S/I                                  | WC1, WC2                         | ACG TCT TTA AAC ATC AAC TCA GCC/                                                   | 2140174/                                                | ECs2134 | hypothetical protein                                |

|   |           |     |          |                                                                  |                     |         |                                                                 |
|---|-----------|-----|----------|------------------------------------------------------------------|---------------------|---------|-----------------------------------------------------------------|
|   |           |     |          | AAC GTC AGG GTT GAT CAT TGG                                      | 2140962             |         |                                                                 |
| 2 | 2616879GA |     | WC1, WC2 | AGA GTT GAT GTA GTT GTG TTC CAG/<br>AGA ACA GCT CAA TCT CAG TCC  | 2615145/<br>2616911 | ECs2651 | excinuclease ABC subunit C                                      |
| 2 | 4349372GC |     | WC1, WC2 | TGA TAA CGC GTT GTA TGG CAC/<br>AAT CAT GCC AAA ACG ACC GTC      | 4348272/<br>4349846 | ECs4343 | periplasmic binding protein for nickel                          |
| 3 | 484705TG  | D/E | WC1      | ATG TTA AAT GCA TGG CAC CTG/<br>AGA CAT GAT CCT GTT CAG CTT C    | 484496/<br>486313   | ECs0453 | maltodextrin glucosidase                                        |
| 3 | 611124CT  | H/Y | WC1      | AGC GAT ATT GAT TCG CGA CAG/<br>ATC TGC GTA AAG ATC TCA CCG      | 610353/<br>611159   | ECs0554 | putative metal resistance protein                               |
| 3 | 747134TC  | S/G | WC1      | ATT CAA GCT GTG ACT GAG TGC/<br>TAG ATG CTT TCG GTG CCA TC       | 746559/<br>747671   | ECs0672 | rod shape-determining membrane protein                          |
| 3 | 754785TG  | D/E | WC1      | ACC ACC AAT GTA GAT ATC CAC C/<br>TGT TCA ACT CTG GCG AGT TC     | 753559/<br>756141   | ECs0680 | leucine tRNA synthetase                                         |
| 3 | 1463295CA | A/E | WC1      | TAG GTT GCG TTA ACA ACC AAG T/<br>ACT GTC TCT GCA CTA CAA TTG C  | 1463090/<br>1463545 | ECs1419 | minor curlin subunit precursor CsgB                             |
| 3 | 2332345CA | A/E | WC1      | ATT GCT GCT GGA ACG TCA G/<br>TAT CCG TTG GCT GAT TTG TTG        | 2328813/<br>2333429 | ECs2362 | probable ATP-dependent helicase Lhr                             |
| 3 | 2416915GT | A/E | WC1      | AAG CGT TCC ATA ATC AGC CTC/<br>AGA GAT GCT GGC TAT TGA AAT G    | 2416659/<br>2418011 | ECs2440 | phospho-beta-glucosidase                                        |
| 3 | 3173905GA | A/V | WC1      | AGA ATT TTG ACC TGA TCT GGC TC/<br>TGT CGA TGC GGA AGA TAT GTC   | 3173871/<br>3175136 | ECs3215 | putative adenine-specific methylase                             |
| 3 | 3209936CT |     | WC1      | ACA GGG TCA GTC CTG GTA G/<br>TTC TAA CGT CGC AAT ACC GAC        | 3208775/<br>3210313 | ECs3246 | multidrug resistance protein Y                                  |
| 3 | 3421037GA | H/Y | WC1      | ATG TCA GAG ATT GCA AGT TGC/<br>ATT TGG AAA ACG CAC CAC CAG      | 3421002/<br>3421382 | ECs3429 | CoA:apo-[acyl-carrier-protein]<br>pantetheinophosphotransferase |
| 3 | 3540151CT |     | WC1      | AGA TCG CTC AAA CGA AGA GAG/<br>TGG TGA TAT TGA ACA TAT GCT GAC  | 3539041/<br>3540597 | ECs3550 | gamma-glutamate-cysteine ligase                                 |
| 3 | 3779900GA | G/S | WC1      | ATG TGG AGC AAT TTA CGT CTG/<br>ATC TCT TGT CCG GTA TAG CAG      | 3779462/<br>3780442 | ECs3770 | hypothetical protein                                            |
| 3 | 4418769CA | A/S | WC1      | TTA AAC GTC CCA CGC ACA TAC/<br>TGT GGA ACT GAT GCA GAA GAC      | 4418428/<br>4420503 | ECs4404 | hypothetical protein                                            |
| 3 | 4576291GA | A/T | WC1      | ACG TTG ATC CTT GAT GAT GCG/<br>TCA ACG GTA ATT CAG GCC ATC      | 4575004/<br>4576713 | ECs4531 | hypothetical protein                                            |
| 3 | 4781387TG | I/L | WC1      | TAG ATA GTT CAC CAC CGG TTG/<br>ACA ACG GAA GCT AAA CCT GC       | 4780326/<br>4781522 | ECs4732 | HemY protein                                                    |
| 3 | 5321302GT |     | WC1      | ATG CTG AAC ATG CCA AAG TCC/<br>AAC GTG GGT GAT TAC TAT CAA GC   | 5320297/<br>5321718 | ECs5217 | trehalose specific PTS system enzyme II                         |
| 4 | 207231GA  | A/T | WC2      | TTT GGT GAA CTA AAG CCA GAT G/<br>ATT CCA TCC AGC AAA TGA ACC    | 206691/<br>207839   | ECs0184 | lipid A-disaccharide synthase                                   |
| 4 | 653171CT  |     | WC2      | ATG GTG TTG GAT TTC GTG GTG/<br>TGT AAT TGG CAG ATA ATT GCG TC   | 652149/<br>654758   | ECs0594 | putative outer membrane protein                                 |
| 4 | 1067276CA |     | WC2      | ATC ACT CGC TTT GAA CTT AAC C/<br>TGT GGT GAA CTA AAG CCA GAT G/ | 1064301/<br>1064301 | ECs0975 | cell division protein                                           |



|   |           |     |                            |                                                                     |                     |         |                                                              |
|---|-----------|-----|----------------------------|---------------------------------------------------------------------|---------------------|---------|--------------------------------------------------------------|
|   |           |     |                            | TCA GTT TAT AAC GAC GCT CCA TC                                      | 1068329             |         |                                                              |
| 4 | 1235736AC | V/G | WC2                        | TCG GTG TCT GAT AAT GTC AGC/<br>TAC ACT CAG GAC AAC TGC TAT C       | 1235615/<br>1236307 | ECs1150 | response transcriptional regulator for torA                  |
| 4 | 1535509AT | S/C | WC2                        | ATC GTA AAG GCG AGC TGT TC/<br>ATA GCG TTT GCA CAG GTT GTC          | 1534552/<br>1535751 | ECs1494 | hypothetical protein                                         |
| 4 | 1867688GA |     | WC2                        | TCA AAC TGC AAC AGC TCA TCA T/<br>AAC GTG CTT TCT GAC ACA GAA G     | 1867423/<br>1868919 | ECs1874 | putative glutamine synthetase                                |
| 4 | 2464012GA | A/V | WC2                        | AAC GAA TGG ATT CTT CAC TCA C/<br>ACA AAT CAA TCC TGT GCC TAA G     | 2463618/<br>2464031 | ECs2487 | hypothetical protein                                         |
| 4 | 3157658GA | P/L | WC2                        | AGA AAG TTG CTT CAA CTC ACC/<br>ATG AGC CTG ATA TGA TGC CAG         | 3157375/<br>3158037 | ECs3198 | putative lipoprotein                                         |
| 4 | 3319266GA | G/S | WC2                        | TTT GCA TAC CCA CGA CAT GG/<br>TGA CCT GTG TAT GAA ACG TGC          | 3317913/<br>3319931 | ECs3344 | hydrogenase 4 membrane subunit                               |
| 4 | 3342659CA | T/K | WC2                        | ATC ACC GTA AAG CGA TTA AAC TC/<br>TGA TAC GCT GAA TGA AAT CGA AC   | 3341257/<br>3342798 | ECs3364 | exopolyphosphatase                                           |
| 4 | 4204517GA | G/D | WC2                        | ACG AAA CGG TCA ATA TCA TGC C/<br>AAC AGT ACA TCA GTG GGT TCT G     | 4204396/<br>4205265 | ECs4206 | probable phosphoribulokinase                                 |
| 4 | 5015574CT | V/I | WC2                        | AAT CAC TTC AAC AAA CTG ACG AG/<br>AGC ATG ATT GCC AAC TAC TTC      | 5014747/<br>5016336 | ECs4929 | Phosphoribosylaminoimidazolecarboxamideformylt<br>ransferase |
| 4 | 5298260TC |     | WC2                        | ATT GAA TTT GAT CTC CGT CCA C/<br>TCT TTC GAT TCG TAC TCA TCG C     | 5297862/<br>5299595 | ECs5198 | hypothetical protein                                         |
| 4 | 5422614AC | L/R | WC2                        | ACC ATA CAG AAT CGC CAG TAA C/<br>TCG CAA CCG GAT TAT TAA TCC TC    | 5421911/<br>5423089 | ECs5293 | putative transport protein                                   |
| 6 | 554623GA  | V/I | M1-22, K1, K2, Wa1,<br>WA2 | TGG AAA GTG CTG GAG AAG AAC/<br>AGA GCA AGT TCC AGA TGA TCA C       | 552601/<br>555963   | ECs0518 | mechanosensitive channel protein                             |
| 6 | 3615468GA | G/E | M1-22, K1, K2, Wa1,<br>WA2 | ACA ACA ATA CAC ACC TCA GGT G/<br>TTA CAT GGT GCA AGC ATC TGC       | 3615328/<br>3615897 | ECs3625 | hypothetical protein                                         |
| 6 | 5196793CG | T/S | M1-22, K1, K2, Wa1,<br>Wa2 | TGA CTG ATT TCG AGG TCT GTA AG/<br>TAT GGT TGA TAC CTG CGC AAC      | 5196360/<br>5197715 | ECs5101 | alpha-galactosidase                                          |
| 7 | 3840700GA |     | Wa1, Wa2                   | AAA CTC ATC ACG CTG TTG GTG/<br>TTA CGA ACT GCT CGA ACA GAC         | 3840152/<br>3841159 | ECs3832 | putative alpha helix chain                                   |
| 7 | 4805937CT | P/L | Wa1, Wa2                   | TGA TGT CTT AAT CAT CGA CCA TCG/<br>AGA AGC GTA AGT TAC GTC GAT ATC | 4805480/<br>4806502 | ECs4755 | lysophospholipase L(2)                                       |
| 8 | 452998CT  | H/Y | Wa2                        | TAA CGT TGA TCA GTT CGA TGC/<br>TTC AGC CTG ATA GGT GTA TGC         | 451255/<br>454197   | ECs0424 | putative flagellin structural protein                        |
| 8 | 3621144GA | V/I | Wa2                        | ACT TCC GCG ATG ATC ATT ACC/<br>AGA ATG GCG TAG ATG GTG AAG         | 3620709/<br>3621986 | ECs3631 | putative transport protein                                   |
| 8 | 3668504CT |     | Wa2                        | ATC AGG CCT ACA TAA CTC CTG/<br>TGC CTC TGA TCG TTC CAT TAT C       | 3668481/<br>3669578 | ECs3673 | membrane-bound lytic murein transglycosylase A               |
| 8 | 3905431CT | H/Y | Wa2                        | TTC TCC AGA CGA TAG TTC AGT C/<br>AAA TCT ACG AGA ACG GAC GTG       | 3904066/<br>3906324 | ECs3903 | DNA topoisomerase IV subunit A                               |
| 9 | 219932GA  | T/I | Wa1                        | TTC GAC CAC ACT GCT TAA CTG/<br>TTC GAC CAC ACT GCT TAA CTG/        | 219511/<br>219511/  | ECs0195 | hypothetical protein                                         |

|    |           |     |               |                                                                   |                     |         |                                                                          |
|----|-----------|-----|---------------|-------------------------------------------------------------------|---------------------|---------|--------------------------------------------------------------------------|
|    |           |     |               | TTC CAG CAT CAA AGC TCT TTC                                       | 220335              |         |                                                                          |
| 9  | 838912AC  | Y/S | Wa1           | ACG TTC AAC GAA GTC AAC ATG/<br>AGA TCT TCA ACC GTC AGC TTG       | 838167/<br>839384   | ECs0752 | 2-oxoglutarate dehydrogenase<br>dihydrolipoyltranssuccinase E2 component |
| 9  | 961676GT  | E/* | Wa1           | TTG CCT GAT TGA CGT TAA CG/<br>TCA TTG ATC CTA TGT TAC CCT TG     | 960791/<br>961876   | ECs0879 | putative dehydrogenase                                                   |
| 9  | 2041566CA |     | Wa1           | AGT TGA TGA AGT ACA TCC AGC/<br>TGG TGA TAA CTA TCA TCG CCA G     | 2040246/<br>2041796 | ECs2057 | L-asparagine permease                                                    |
| 9  | 3017687CT | P/S | Wa1           | TCA TCT ACG GTG GCA AAG AAG/<br>TGT GTT ATG AAT GCC AGA TGC       | 3017447/<br>3017731 | ECs3077 | 50S ribosomal subunit protein L25                                        |
| 9  | 4111029GA | G/D | Wa1           | ATA TCA ATC ACG AAC AGG CAG/<br>TGC GAT ATT CGG AAT AAG ACT G     | 4110116/<br>4111480 | ECs4100 | putative C4-dicarboxylate carrier protein                                |
| 9  | 4863308CT |     | Wa1           | TTC AAC AGT TAT TTC TCC ACC G/<br>ACC ACC CTG TTT GAG ATG AAG     | 4863038/<br>4865074 | ECs4800 | putative glycosidase                                                     |
| 10 | 6456AC    |     | M1-22, K1, K2 | AGT TTG TCG CTG ATA CGC ATC/<br>TGT GGT TCA TAC CAT TGC CAG       | 5700/<br>6476       | ECs0006 | hypothetical protein                                                     |
| 10 | 2478628GA | E/K | M1-22, K1, K2 | AGT GAC GTG ACA AAT CAT GCG/<br>TCA CAA GCT ACG TAG CCA GTC       | 2478493/<br>2478861 | ECs2501 | hypothetical protein                                                     |
| 10 | 3243126CA |     | M1-22, K1, K2 | ACT TCA ACA AGG ATT CCA GCA C/<br>AGT GAA CTG CTG TTA GTG CTG     | 3242427/<br>3244655 | ECs3273 | hypothetical protein                                                     |
| 10 | 3517964GA | R/H | M1-22, K1, K2 | ATA GGG ATT ATC TGT ACC GTG C/<br>AGA CTC ACT AAC ATC GCT TCC     | 3517843/<br>3518523 | ECs3525 | putative transcriptional regulator                                       |
| 10 | 3780989GA |     | M1-22, K1, K2 | AGG CTC CAG ATA ACA ATC ATC AAC/<br>AGA GGT ATA CAT GTG CGT GTA C | 3780519/<br>3781178 | ECs3771 | putative oxidoreductase                                                  |
| 10 | 4492725GA |     | M1-22, K1, K2 | ATA CGA CGT GCT CTC CTA TCG/<br>TGA CGA TTA TGC CAT GCA ACA G     | 4492461/<br>4493201 | ECs4460 | putative outer membrane protein                                          |
| 11 | 3894065CT | P/L | M18           | ACG ATT CAG GAG TAC AAT AGG C/<br>TGG TGA TAT TTA GCA GGA AGC TG  | 3893920/<br>3894579 | ECs3893 | hypothetical protein                                                     |
| 12 | 2617146GA | T/M | K2            | ACA TAG ATA ACC GTA CCA CCA G/<br>TGC GAT CCG TTC TGT CTA TTC     | 2616974/<br>2617630 | ECs2652 | putative 2-component transcriptional regulator                           |
| 12 | 3587723CT | D/N | K2            | TGG TTC ATG GTC CAG CTT ATG/<br>TCA GCT TTA CCT TGG TGA GAT TG    | 3587082/<br>3588074 | ECs3595 | sigma factor RpoS                                                        |
| 13 | 3838874GA |     | M19           | ACT GGT GGC TTT GGT TAT GAT C/<br>ACG CTG ATA ATC AAC AAA GCG     | 3838773/<br>3839909 | ECs3831 | putative oxidase                                                         |
